# Supplementary material
Source: Springer Nature journal article supplement (https://www.springermedizin.de/resource/supplementary/12914_2008_70_MOESM3_ESM.pdf/9537448)

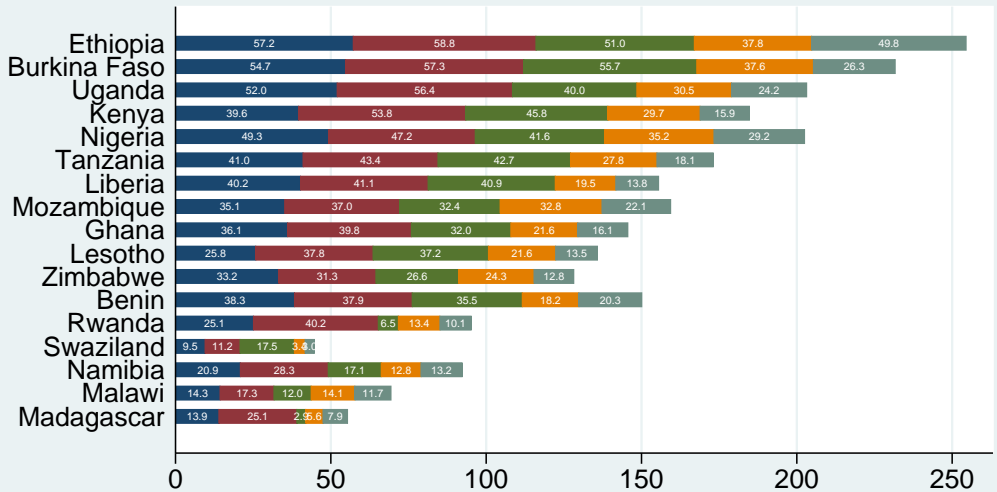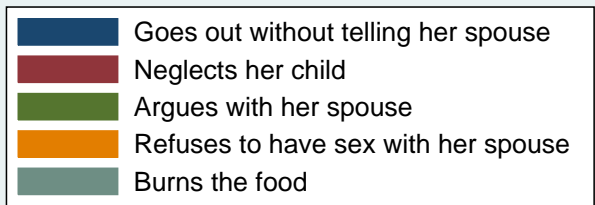

Supplement: MOESM3 [file 9537448]
